# Supplementary material for: A combined experimental and computational study on the sulfoxidation by high-valent iron bispidine complexes
Source: Royal Society of Chemistry journal article supplement (doi:10.1039/c1dt11533b), 2011-01-01
Supplement: c1dt11533b.pdf [file c1dt11533b.pdf]

# A combined experimental and computational study on the sulfoxidation by high-valent iron bispidine complexes

*Madhavan Jaccob,<sup>a,b</sup> Peter Comba,<sup>a,\*</sup> Martin Maurer,<sup>a</sup> Prabha Vadivelu,<sup>a</sup> and Ponnambalam Venuvanalingam<sup>b</sup>*

<sup>a</sup> Universität Heidelberg, Anorganisch-Chemisches Institut,

INF 270, D-69120 Heidelberg, Germany

Fax: +49-6226-546617

e-mail: [peter.comba@aci.uni-heidelberg.de](mailto:peter.comba@aci.uni-heidelberg.de)

<sup>b</sup> Theoretical and Computational Chemistry Laboratory, School of Chemistry,

Bharathidasan University, Tiruchirappalli – 620 024

Tamil Nadu, India

## Supplementary Information

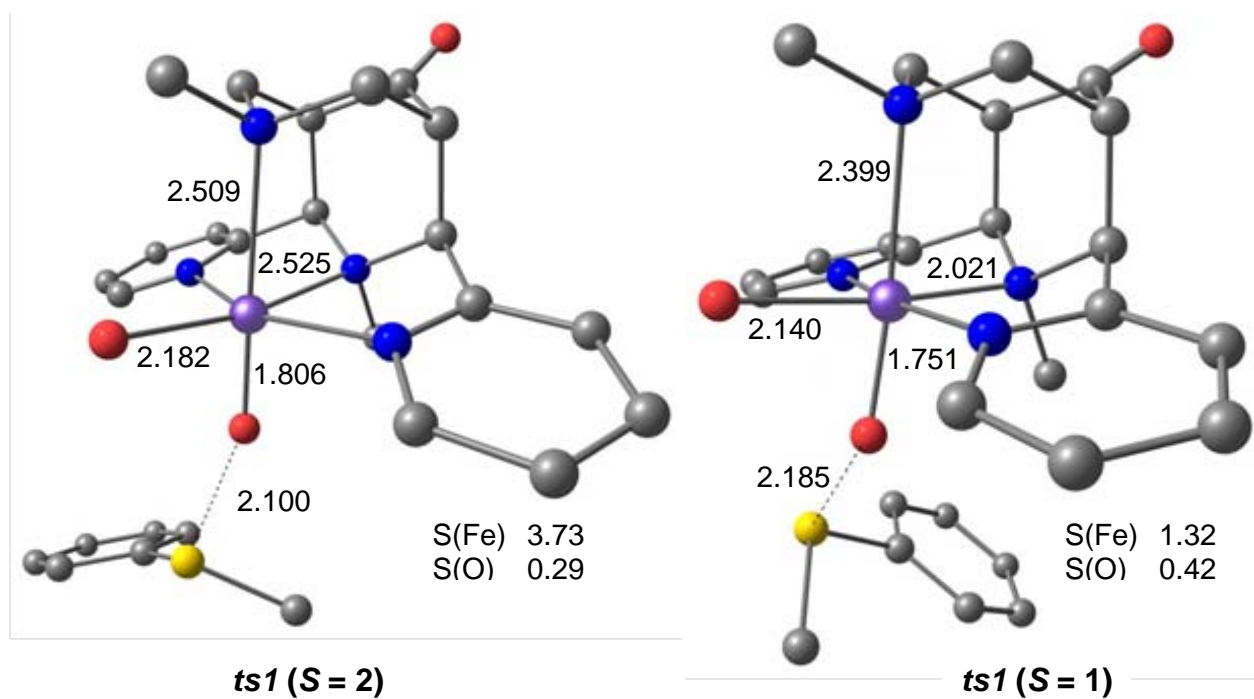

**Figure S1.** Transition states for the oxo-transfer step on the  $S = 2$  and  $S = 1$  surfaces of  $[(L^1)Fe^{IV}=O(OH_2)]^{2+}$ , *trans*-N7 isomer; distances in Å.

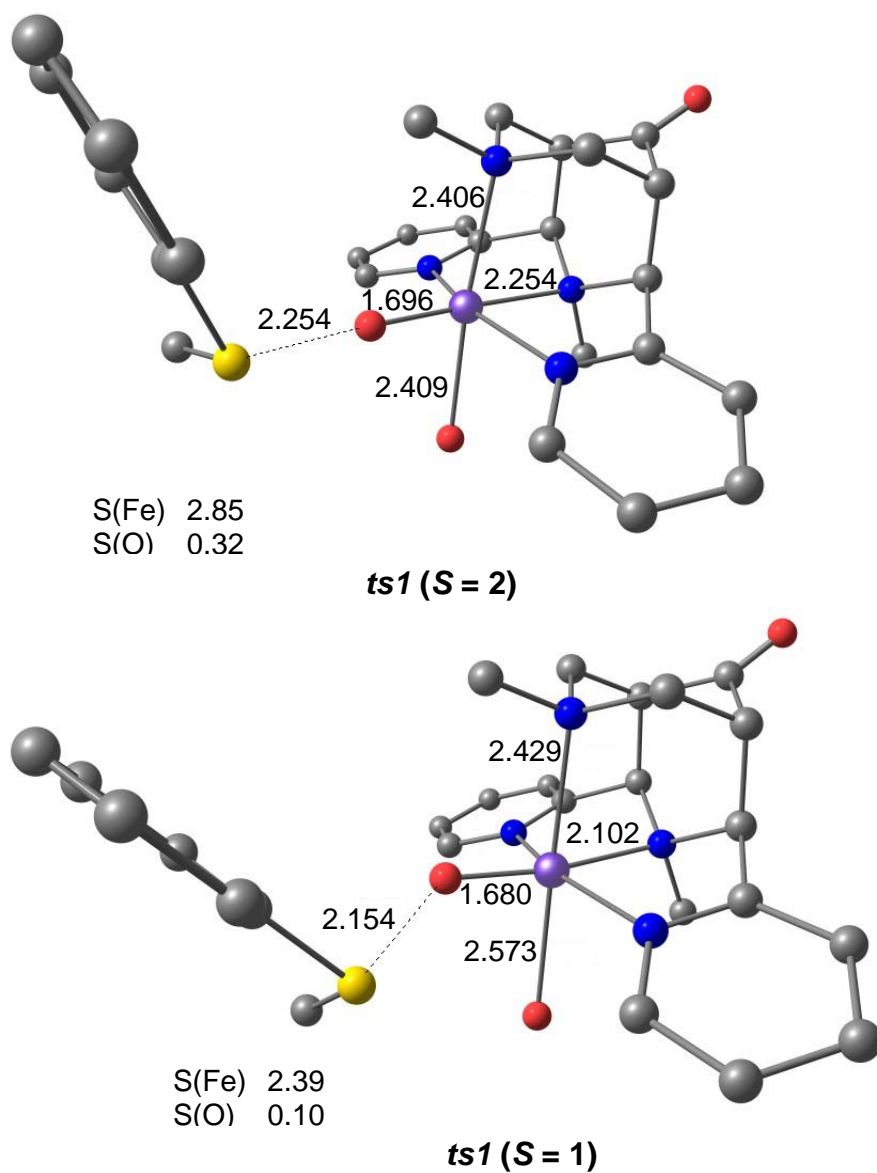

**Figure S2.** Transition states for the oxo-transfer step on the  $S = 2$  and  $S = 1$  surfaces of  $[(L^1)Fe^{IV}=O(OH_2)]^{2+}$ , *trans*N3 isomer, distances in Å.

**Table S1.** Selected geometric parameters (bond distances in Å, angles in deg) and spin densities for the *ts1*, *int*, *ts2*, and the products of  $1_{transN7}$ ,  $1_{transN3}$  and **2** in the  $S = 2$  and  $S = 1$  spin states.

| Species                                                                                         | Geometrical Parameters |       |      |                    |      |        | Spin Density |        |
|-------------------------------------------------------------------------------------------------|------------------------|-------|------|--------------------|------|--------|--------------|--------|
|                                                                                                 | Fe-N7                  | Fe-N3 | Fe-O | Fe-OH <sub>2</sub> | O-S  | Fe-O-S | S(Fe)        | S(O)   |
| [[L <sup>1</sup> Fe <sup>IV</sup> =O(H <sub>2</sub> O)] <sup>2+</sup> ( $1_{transN3}$ ) + PhMeS |                        |       |      |                    |      |        |              |        |
| <i>ts1</i> (S=2)                                                                                | 2.41                   | 2.13  | 1.70 | 2.41               | 2.25 | 168.3  | 2.85         | 0.32   |
| <i>ts1</i> (S=1)                                                                                | 2.43                   | 2.10  | 1.68 | 2.54               | 2.15 | 133.2  | 2.39         | 0.10   |
| <i>int</i> (S=2)                                                                                | 2.35                   | 2.26  | 2.02 | 2.33               | 1.58 | 130.4  | 3.73         | 0.06   |
| <i>int</i> (S=1)                                                                                | 2.45                   | 2.06  | 2.02 | 2.45               | 1.57 | 130.8  | 2.00         | 0.01   |
| [[L <sup>1</sup> Fe <sup>IV</sup> =O(H <sub>2</sub> O)] <sup>2+</sup> ( $1_{transN7}$ ) + PhMeS |                        |       |      |                    |      |        |              |        |
| <i>ts1</i> (S=2)                                                                                | 2.51                   | 2.25  | 1.81 | 2.18               | 2.10 | 145.6  | 3.73         | 0.29   |
| <i>ts1</i> (S=1)                                                                                | 2.39                   | 2.02  | 1.75 | 2.14               | 2.19 | 142.3  | 1.32         | 0.42   |
| <i>int</i> (S=2)                                                                                | 2.36                   | 2.26  | 2.21 | 2.19               | 1.57 | 135.1  | 3.74         | 0.03   |
| <i>int</i> (S=1)                                                                                | 2.43                   | 2.05  | 2.33 | 2.13               | 1.57 | 137.5  | 1.99         | 0.02   |
| [[L <sup>2</sup> Fe <sup>IV</sup> =O] <sup>2+</sup> ( <b>2</b> ) + PhMeS                        |                        |       |      |                    |      |        |              |        |
| <i>ts1</i> (S=2)                                                                                | 2.45                   | 2.26  | 1.88 | -                  | 2.04 | 132.5  | 3.72         | 0.19   |
| <i>ts1</i> (S=1)                                                                                | 2.38                   | 2.05  | 1.76 | -                  | 2.11 | 142.7  | 1.37         | 0.04   |
| <i>int</i> (S=2)                                                                                | 2.39                   | 2.24  | 2.12 | -                  | 1.57 | 133.2  | 3.73         | 0.04   |
| <i>int</i> (S=1)                                                                                | 2.46                   | 2.07  | 2.20 | -                  | 1.56 | 133.8  | 1.98         | 0.03   |
| <i>ts2</i> (S=2)                                                                                | 2.30                   | 2.22  | 3.29 | 3.51               | 1.56 | 154.7  | 3.73         | 0.001  |
| <i>pro</i> (S=2)                                                                                | 2.36                   | 2.25  | 3.88 | 2.15               | -    | -      | 3.74         | 0.0007 |
